# Supplementary material
Source: MDPI journal article supplement (https://www.mdpi.com/2073-4441/12/12/3391)
Supplement: s1 [file s1]

**Table S2. List of papers in the database**

| 1    | Governance AND Water AND Climate AND Future Delta                       | N=10                                                                                                                                      |      |                                                                                     |                                 |                                                                                                                                                                                                                                                                                                                                                       |                  |                              |
|------|-------------------------------------------------------------------------|-------------------------------------------------------------------------------------------------------------------------------------------|------|-------------------------------------------------------------------------------------|---------------------------------|-------------------------------------------------------------------------------------------------------------------------------------------------------------------------------------------------------------------------------------------------------------------------------------------------------------------------------------------------------|------------------|------------------------------|
| Code | Authors                                                                 | Title                                                                                                                                     | Year | Source title                                                                        | DOI                             | Link                                                                                                                                                                                                                                                                                                                                                  | Document Type    | Main location covered        |
| 1-01 | Garschagen M., Renaud F.G., Birkmann J.                                 | Dynamic Resilience of Peri-Urban Agriculturalists in the Mekong Delta Under Pressures of Socio-Economic Transformation and Climate Change | 2011 | Advances in Global Change Research                                                  | 10.1007/978-94-007-0934-8_9     | <a href="https://www.scopus.com/inward/record.uri?eid=2-s2.0-84872174506&amp;doi=10.1007%2f978-94-007-0934-8_9&amp;partnerID=40&amp;md5=1caf4e9e0f806d74cb7190e67e1d641f">https://www.scopus.com/inward/record.uri?eid=2-s2.0-84872174506&amp;doi=10.1007%2f978-94-007-0934-8_9&amp;partnerID=40&amp;md5=1caf4e9e0f806d74cb7190e67e1d641f</a>         | Book Chapter     | Mekong delta, Vietnam        |
| 1-02 | King B., Shinn J.E., Crews K.A., Young K.R.                             | Fluid waters and rigid livelihoods in the Okavango Delta of Botswana                                                                      | 2016 | Land                                                                                | 10.3390/land5020016             | <a href="https://www.scopus.com/inward/record.uri?eid=2-s2.0-84978420493&amp;doi=10.3390%2fand5020016&amp;partnerID=40&amp;md5=2e218b03da049f2be94008adabe82b68">https://www.scopus.com/inward/record.uri?eid=2-s2.0-84978420493&amp;doi=10.3390%2fand5020016&amp;partnerID=40&amp;md5=2e218b03da049f2be94008adabe82b68</a>                           | Article          | Okavango Delta, Botswana     |
| 1-03 | Ha T.P., Dieperink C., Dang Tri V.P., Otter H.S., Hoekstra P.           | Governance conditions for adaptive freshwater management in the Vietnamese Mekong Delta                                                   | 2018 | Journal of Hydrology                                                                | 10.1016/j.jhydrol.2017.12.024   | <a href="https://www.scopus.com/inward/record.uri?eid=2-s2.0-85038011514&amp;doi=10.1016%2fj.jhydrol.2017.12.024&amp;partnerID=40&amp;md5=0df0a3db89036078a33d29ceee808a11">https://www.scopus.com/inward/record.uri?eid=2-s2.0-85038011514&amp;doi=10.1016%2fj.jhydrol.2017.12.024&amp;partnerID=40&amp;md5=0df0a3db89036078a33d29ceee808a11</a>     | Article          | Mekong delta, Vietnam        |
| 1-04 | Gaglio M., Lanzoni M., Nobili G., Viviani D., Castaldelli G., Fano E.A. | Ecosystem services approach for sustainable governance in a brackish water lagoon used for aquaculture                                    | 2019 | Journal of Environmental Planning and Management                                    | 10.1080/09640568.2019.1581602   | <a href="https://www.scopus.com/inward/record.uri?eid=2-s2.0-85064828650&amp;doi=10.1080%2f09640568.2019.1581602&amp;partnerID=40&amp;md5=c6acff7f29f894c7afcb3fea31262ca9">https://www.scopus.com/inward/record.uri?eid=2-s2.0-85064828650&amp;doi=10.1080%2f09640568.2019.1581602&amp;partnerID=40&amp;md5=c6acff7f29f894c7afcb3fea31262ca9</a>     | Article          | Po river delta, Italy        |
| 1-05 | Death C.                                                                | Critical environmental politics                                                                                                           | 2013 | Critical Environmental Politics                                                     | 10.4324/9781315883076           | <a href="https://www.scopus.com/inward/record.uri?eid=2-s2.0-84925804163&amp;doi=10.4324%2f9781315883076&amp;partnerID=40&amp;md5=2379e93d0cf1a14c3037a0d4a7721867">https://www.scopus.com/inward/record.uri?eid=2-s2.0-84925804163&amp;doi=10.4324%2f9781315883076&amp;partnerID=40&amp;md5=2379e93d0cf1a14c3037a0d4a7721867</a>                     | Book             | Global                       |
| 1-06 | Ehlers E.                                                               | Megacities: Challenge for international and transdisciplinary research. A plea for communication and exchange                             | 2009 | Erde                                                                                |                                 | <a href="https://www.scopus.com/inward/record.uri?eid=2-s2.0-77951556196&amp;partnerID=40&amp;md5=52e5b2f89127b3156c466f0d541a2d56">https://www.scopus.com/inward/record.uri?eid=2-s2.0-77951556196&amp;partnerID=40&amp;md5=52e5b2f89127b3156c466f0d541a2d56</a>                                                                                     | Article          | Global                       |
| 1-07 | Kapetas L., Kazakis N., Voudouris K., McNicholl D.                      | Water allocation and governance in multi-stakeholder environments: Insight from Axios Delta, Greece                                       | 2019 | Science of the Total Environment                                                    | 10.1016/j.scitotenv.2019.133831 | <a href="https://www.scopus.com/inward/record.uri?eid=2-s2.0-85070630727&amp;doi=10.1016%2fj.scitotenv.2019.133831&amp;partnerID=40&amp;md5=98d35356c66ed21a24ef07a6b9beef7b">https://www.scopus.com/inward/record.uri?eid=2-s2.0-85070630727&amp;doi=10.1016%2fj.scitotenv.2019.133831&amp;partnerID=40&amp;md5=98d35356c66ed21a24ef07a6b9beef7b</a> | Article          | Axios Delta, Greece          |
| 1-08 | Kaufmann M., Hartmann T.                                                | The Netherlands and flood risk management: A paradigm shift?                                                                              | 2018 | Geographische Rundschau                                                             |                                 | <a href="https://www.scopus.com/inward/record.uri?eid=2-s2.0-85044996010&amp;partnerID=40&amp;md5=c212a932adea124f634d7a2bab0e1cf2">https://www.scopus.com/inward/record.uri?eid=2-s2.0-85044996010&amp;partnerID=40&amp;md5=c212a932adea124f634d7a2bab0e1cf2</a>                                                                                     | Article          | Dutch delta, The Netherlands |
| 1-09 | Stouthamer E., Van Asselen S.                                           | Future Deltas Utrecht University research focus area: Towards sustainable management of sinking deltas                                    | 2015 | Proceedings of the International Association of Hydrological Sciences               | 10.5194/piahs-372-179-2015      | <a href="https://www.scopus.com/inward/record.uri?eid=2-s2.0-85053106179&amp;doi=10.5194%2fpiabs-372-179-2015&amp;partnerID=40&amp;md5=902a551a13902bc59f4ef8fca4c17011">https://www.scopus.com/inward/record.uri?eid=2-s2.0-85053106179&amp;doi=10.5194%2fpiabs-372-179-2015&amp;partnerID=40&amp;md5=902a551a13902bc59f4ef8fca4c17011</a>           | Conference Paper | Global                       |
| 1-10 | Reinhard S., Folmer H.                                                  | Water policy in the Netherlands: Integrated management in a densely populated delta                                                       | 2011 | Water Policy in the Netherlands: Integrated Management in a Densely Populated Delta | 10.4324/978193631413            | <a href="https://www.scopus.com/inward/record.uri?eid=2-s2.0-84920778570&amp;doi=10.4324%2f978193631413&amp;partnerID=40&amp;md5=d0844dd61fde26d1d559d9c5df58f451">https://www.scopus.com/inward/record.uri?eid=2-s2.0-84920778570&amp;doi=10.4324%2f978193631413&amp;partnerID=40&amp;md5=d0844dd61fde26d1d559d9c5df58f451</a>                       | Book             | Dutch delta, The Netherlands |

| <b>2</b>     | <b>Adaptive pre/0 Governance AND Delta</b>                            | <b>N=7</b>                                                                                                                              |      |                                  |                                  |                                                                                                                                                                                                                                                                                                                                                         |               |                                     |
|--------------|-----------------------------------------------------------------------|-----------------------------------------------------------------------------------------------------------------------------------------|------|----------------------------------|----------------------------------|---------------------------------------------------------------------------------------------------------------------------------------------------------------------------------------------------------------------------------------------------------------------------------------------------------------------------------------------------------|---------------|-------------------------------------|
| Article code | Authors                                                               | Title                                                                                                                                   | Year | Source title                     | DOI                              | Link                                                                                                                                                                                                                                                                                                                                                    | Document Type | Main location covered               |
| 2-01         | Huntjens P., Lebel L., Pahl-Wostl C., Camkin J., Schulze R., Kranz N. | Institutional design propositions for the governance of adaptation to climate change in the water sector                                | 2012 | Global Environmental Change      | 10.1016/j.gloenvcha.2011.09.015  | <a href="https://www.scopus.com/inward/record.uri?eid=2-s2.0-84856023605&amp;doi=10.1016%2fj.gloenvcha.2011.09.015&amp;partnerID=40&amp;md5=9e3e1806e452f86ffc95c446214a1c71">https://www.scopus.com/inward/record.uri?eid=2-s2.0-84856023605&amp;doi=10.1016%2fj.gloenvcha.2011.09.015&amp;partnerID=40&amp;md5=9e3e1806e452f86ffc95c446214a1c71</a>   | Article       | Dutch delta, Australia, Africa      |
| 2-02         | Kallis G., Kiparsky M., Norgaard R.                                   | Collaborative governance and adaptive management: Lessons from California's CALFED Water Program                                        | 2009 | Environmental Science and Policy | 10.1016/j.envsci.2009.07.002     | <a href="https://www.scopus.com/inward/record.uri?eid=2-s2.0-70349435265&amp;doi=10.1016%2fj.envsci.2009.07.002&amp;partnerID=40&amp;md5=6758f50ffba93422a3e29e6f031e3bfc">https://www.scopus.com/inward/record.uri?eid=2-s2.0-70349435265&amp;doi=10.1016%2fj.envsci.2009.07.002&amp;partnerID=40&amp;md5=6758f50ffba93422a3e29e6f031e3bfc</a>         | Article       | California, USA                     |
| 2-03         | Boezeman D., Vink M., Leroy P.                                        | The Dutch Delta Committee as a boundary organisation                                                                                    | 2013 | Environmental Science and Policy | 10.1016/j.envsci.2012.12.016     | <a href="https://www.scopus.com/inward/record.uri?eid=2-s2.0-84873249120&amp;doi=10.1016%2fj.envsci.2012.12.016&amp;partnerID=40&amp;md5=3e42a18ad55d16ba4c0b89b2ee1632a6">https://www.scopus.com/inward/record.uri?eid=2-s2.0-84873249120&amp;doi=10.1016%2fj.envsci.2012.12.016&amp;partnerID=40&amp;md5=3e42a18ad55d16ba4c0b89b2ee1632a6</a>         | Article       | Dutch delta, The Netherlands        |
| 2-04         | Berardo R., Olivier T., Lavers A.                                     | Focusing Events and Changes in Ecologies of Policy Games: Evidence from the Paraná River Delta                                          | 2015 | Review of Policy Research        | 10.1111/ropr.12128               | <a href="https://www.scopus.com/inward/record.uri?eid=2-s2.0-84947940412&amp;doi=10.1111%2fropr.12128&amp;partnerID=40&amp;md5=ca0aaebc745d788d9fac14de19e83d8a">https://www.scopus.com/inward/record.uri?eid=2-s2.0-84947940412&amp;doi=10.1111%2fropr.12128&amp;partnerID=40&amp;md5=ca0aaebc745d788d9fac14de19e83d8a</a>                             | Article       | Paraná River Delta, Argentina       |
| 2-05         | Garschagen M.                                                         | Decentralizing urban disaster risk management in a centralized system? Agendas, actors and contentions in Vietnam                       | 2016 | Habitat International            | 10.1016/j.habitatint.2015.08.030 | <a href="https://www.scopus.com/inward/record.uri?eid=2-s2.0-84949809899&amp;doi=10.1016%2fj.habitatint.2015.08.030&amp;partnerID=40&amp;md5=d40663789e9c5e8558b0913b8ae34f01">https://www.scopus.com/inward/record.uri?eid=2-s2.0-84949809899&amp;doi=10.1016%2fj.habitatint.2015.08.030&amp;partnerID=40&amp;md5=d40663789e9c5e8558b0913b8ae34f01</a> | Article       | Mekong delta, Vietnam               |
| 2-06         | van Buuren A., Keessen A.M., van Leeuwen C., Eshuis J., Ellen G.J.    | Implementation arrangements for climate adaptation in the netherlands: Characteristics and underlying mechanisms of adaptive governance | 2015 | Ecology and Society              | 10.5751/ES-07704-200411          | <a href="https://www.scopus.com/inward/record.uri?eid=2-s2.0-84953317389&amp;doi=10.5751%2fES-07704-200411&amp;partnerID=40&amp;md5=9d42720c8aa5aa5fe84a90c17af65613">https://www.scopus.com/inward/record.uri?eid=2-s2.0-84953317389&amp;doi=10.5751%2fES-07704-200411&amp;partnerID=40&amp;md5=9d42720c8aa5aa5fe84a90c17af65613</a>                   | Article       | Dutch delta, The Netherlands        |
| 2-07         | Restemeyer B., van den Brink M., Woltjer J.                           | Resilience unpacked—framing of ‘uncertainty’ and ‘adaptability’ in long-term flood risk management strategies for London and Rotterdam  | 2018 | European Planning Studies        | 10.1080/09654313.2018.1490393    | <a href="https://www.scopus.com/inward/record.uri?eid=2-s2.0-85048772238&amp;doi=10.1080%2f09654313.2018.1490393&amp;partnerID=40&amp;md5=21e0755c208e9e8dbcff1085c74bc692">https://www.scopus.com/inward/record.uri?eid=2-s2.0-85048772238&amp;doi=10.1080%2f09654313.2018.1490393&amp;partnerID=40&amp;md5=21e0755c208e9e8dbcff1085c74bc692</a>       | Article       | Dutch delta, The Netherlands and UK |

| <b>3</b>     | <b>Interactive pre/0 Governance AND Delta</b> | <b>N=1</b>                                                                          |      |              |                               |                                                                                                                                                                                                                                                                                                                                                         |               |                              |
|--------------|-----------------------------------------------|-------------------------------------------------------------------------------------|------|--------------|-------------------------------|---------------------------------------------------------------------------------------------------------------------------------------------------------------------------------------------------------------------------------------------------------------------------------------------------------------------------------------------------------|---------------|------------------------------|
| Article code | Authors                                       | Title                                                                               | Year | Source title | DOI                           | Link                                                                                                                                                                                                                                                                                                                                                    | Document Type | Main location covered        |
| 3-01         | Wiering M.A., Driessen P.P.J.                 | Beyond the art of diking: Interactive policy on river management in The Netherlands | 2001 | Water Policy | 10.1016/S1366-7017(01)00075-7 | <a href="https://www.scopus.com/inward/record.uri?eid=2-s2.0-0035661554&amp;doi=10.1016%2fS1366-7017%2801%2900075-7&amp;partnerID=40&amp;md5=008e351e6f0b16cc6ed727b7c7a118e6">https://www.scopus.com/inward/record.uri?eid=2-s2.0-0035661554&amp;doi=10.1016%2fS1366-7017%2801%2900075-7&amp;partnerID=40&amp;md5=008e351e6f0b16cc6ed727b7c7a118e6</a> | Article       | Dutch delta, The Netherlands |

| <b>4</b>     | <b>Reflexive pre/0 Governance AND Delta</b>                                  | <b>N=1</b>                                                                                             |      |                              |                                   |                                                                                                                                                                                                                                                                                                                                                           |               |                              |
|--------------|------------------------------------------------------------------------------|--------------------------------------------------------------------------------------------------------|------|------------------------------|-----------------------------------|-----------------------------------------------------------------------------------------------------------------------------------------------------------------------------------------------------------------------------------------------------------------------------------------------------------------------------------------------------------|---------------|------------------------------|
| Article code | Authors                                                                      | Title                                                                                                  | Year | Source title                 | DOI                               | Link                                                                                                                                                                                                                                                                                                                                                      | Document Type | Main location covered        |
| 4-1          | Termeer C.J.A.M., Dewulf A., Karlsson-Vinkhuyzen S.I., Vink M., van Vliet M. | Coping with the wicked problem of climate adaptation across scales: The Five R Governance Capabilities | 2016 | Landscape and Urban Planning | 10.1016/j.landurbplan.2016.01.007 | <a href="https://www.scopus.com/inward/record.uri?eid=2-s2.0-84992306806&amp;doi=10.1016%2fj.landurbplan.2016.01.007&amp;partnerID=40&amp;md5=539e3475639441e1ff219277bbff636e">https://www.scopus.com/inward/record.uri?eid=2-s2.0-84992306806&amp;doi=10.1016%2fj.landurbplan.2016.01.007&amp;partnerID=40&amp;md5=539e3475639441e1ff219277bbff636e</a> | Article       | Dutch delta, The Netherlands |

| <b>5</b>     | <b>Transformation pre/0 Governance AND Delta</b>   | <b>N=23</b>                                                                                                             |      |                                                      |                                  |                                                                                                                                                                                                                                                                                                                                                         |                  |                          |
|--------------|----------------------------------------------------|-------------------------------------------------------------------------------------------------------------------------|------|------------------------------------------------------|----------------------------------|---------------------------------------------------------------------------------------------------------------------------------------------------------------------------------------------------------------------------------------------------------------------------------------------------------------------------------------------------------|------------------|--------------------------|
| Article code | Authors                                            | Title                                                                                                                   | Year | Source title                                         | DOI                              | Link                                                                                                                                                                                                                                                                                                                                                    | Document Type    | Main location covered    |
| 5-01         | Xu J., Yeh A.G.O.                                  | City repositioning and competitiveness building in regional development: New development strategies in Guangzhou, China | 2005 | International Journal of Urban and Regional Research | 10.1111/j.1468-2427.2005.00585.x | <a href="https://www.scopus.com/inward/record.uri?eid=2-s2.0-27744578466&amp;doi=10.1111%2fj.1468-2427.2005.00585.x&amp;partnerID=40&amp;md5=855537b5830d1209edcd14798daed68e">https://www.scopus.com/inward/record.uri?eid=2-s2.0-27744578466&amp;doi=10.1111%2fj.1468-2427.2005.00585.x&amp;partnerID=40&amp;md5=855537b5830d1209edcd14798daed68e</a> | Review           | Pearl river delta, China |
| 5-02         | Yang D.Y.-R., Wang H.-K.                           | Dilemmas of local governance under the development zone fever in China: A case study of the Suzhou Region               | 2008 | Urban Studies                                        | 10.1177/0042098008089852         | <a href="https://www.scopus.com/inward/record.uri?eid=2-s2.0-42149111012&amp;doi=10.1177%2f0042098008089852&amp;partnerID=40&amp;md5=0ddef0b99964cf9a206675375a1d165">https://www.scopus.com/inward/record.uri?eid=2-s2.0-42149111012&amp;doi=10.1177%2f0042098008089852&amp;partnerID=40&amp;md5=0ddef0b99964cf9a206675375a1d165</a>                   | Article          | Pearl river delta, China |
| 5-03         | Xu J.                                              | Governing city-regions in China: Theoretical issues and perspectives for regional strategic planning                    | 2008 | Town Planning Review                                 |                                  | <a href="https://www.scopus.com/inward/record.uri?eid=2-s2.0-55349148383&amp;partnerID=40&amp;md5=93e97fc261116e2473fc77d0b65f31f6">https://www.scopus.com/inward/record.uri?eid=2-s2.0-55349148383&amp;partnerID=40&amp;md5=93e97fc261116e2473fc77d0b65f31f6</a>                                                                                       | Article          | Pearl river delta, China |
| 5-04         | Wang K., Ng A.K.Y., Lam J.S.L., Fu X.              | Cooperation or competition Factors and conditions affecting regional port governance in South China                     | 2012 | Maritime Economics and Logistics                     | 10.1057/mel.2012.13              | <a href="https://www.scopus.com/inward/record.uri?eid=2-s2.0-84865420327&amp;doi=10.1057%2fmel.2012.13&amp;partnerID=40&amp;md5=877206b85459112163c993a68ca1c4ba">https://www.scopus.com/inward/record.uri?eid=2-s2.0-84865420327&amp;doi=10.1057%2fmel.2012.13&amp;partnerID=40&amp;md5=877206b85459112163c993a68ca1c4ba</a>                           | Conference Paper | Pearl river delta, China |
| 5-05         | van Assche K., Duineveld M., Beunen R., Teampau P. | Delineating locals: Transformations of knowledge/power and the governance of the danube delta                           | 2011 | Journal of Environmental Policy and Planning         | 10.1080/1523908X.2011.559087     | <a href="https://www.scopus.com/inward/record.uri?eid=2-s2.0-79953196539&amp;doi=10.1080%2f1523908X.2011.559087&amp;partnerID=40&amp;md5=1b0b438d1fbac932df304562d049cb50">https://www.scopus.com/inward/record.uri?eid=2-s2.0-79953196539&amp;doi=10.1080%2f1523908X.2011.559087&amp;partnerID=40&amp;md5=1b0b438d1fbac932df304562d049cb50</a>         | Article          | Danube delta, Romania    |

|      |                                                             |                                                                                                                                   |      |                                                                     |                                  |                                                                                                                                                                                                                                                                                                                                                         |              |                            |
|------|-------------------------------------------------------------|-----------------------------------------------------------------------------------------------------------------------------------|------|---------------------------------------------------------------------|----------------------------------|---------------------------------------------------------------------------------------------------------------------------------------------------------------------------------------------------------------------------------------------------------------------------------------------------------------------------------------------------------|--------------|----------------------------|
| 5-06 | Wang C., Ducruet C.                                         | New port development and global city making: Emergence of the Shanghai-Yangshan multilayered gateway hub                          | 2012 | Journal of Transport Geography                                      | 10.1016/j.jtrangeo.2012.07.008   | <a href="https://www.scopus.com/inward/record.uri?eid=2-s2.0-84865440263&amp;doi=10.1016%2Fj.jtrangeo.2012.07.008&amp;partnerID=40&amp;md5=191f9b57d20bd15f2d1db0db21dc48ff">https://www.scopus.com/inward/record.uri?eid=2-s2.0-84865440263&amp;doi=10.1016%2Fj.jtrangeo.2012.07.008&amp;partnerID=40&amp;md5=191f9b57d20bd15f2d1db0db21dc48ff</a>     | Article      | Pearl river delta, China   |
| 5-07 | Ha T.T.T., Bush S.R.                                        | Transformations of Vietnamese shrimp aquaculture policy: Empirical evidence from the Mekong Delta                                 | 2010 | Environment and Planning C: Government and Policy                   | 10.1068/c09194                   | <a href="https://www.scopus.com/inward/record.uri?eid=2-s2.0-78650618404&amp;doi=10.1068%2F09194&amp;partnerID=40&amp;md5=d2e6f60bc5ef6ed8eeef6dc6d87fe04">https://www.scopus.com/inward/record.uri?eid=2-s2.0-78650618404&amp;doi=10.1068%2F09194&amp;partnerID=40&amp;md5=d2e6f60bc5ef6ed8eeef6dc6d87fe04</a>                                         | Article      | Mekong delta, Vietnam      |
| 5-08 | Yang C.                                                     | From Strategic Coupling to Recoupling and Decoupling: Restructuring Global Production Networks and Regional Evolution in China    | 2013 | European Planning Studies                                           | 10.1080/09654313.2013.733852     | <a href="https://www.scopus.com/inward/record.uri?eid=2-s2.0-84880438763&amp;doi=10.1080%2F09654313.2013.733852&amp;partnerID=40&amp;md5=ad7c727a4c0296dfb50955f8046207fd">https://www.scopus.com/inward/record.uri?eid=2-s2.0-84880438763&amp;doi=10.1080%2F09654313.2013.733852&amp;partnerID=40&amp;md5=ad7c727a4c0296dfb50955f8046207fd</a>         | Article      | Pearl river delta, China   |
| 5-09 | Smith T.F., Thomsen D.C., Gould S., Schmitt K., Schlegel B. | Cumulative pressures on sustainable livelihoods: Coastal adaptation in the mekong delta                                           | 2013 | Sustainability (Switzerland)                                        | 10.3390/su5010228                | <a href="https://www.scopus.com/inward/record.uri?eid=2-s2.0-84882641036&amp;doi=10.3390%2Fsu5010228&amp;partnerID=40&amp;md5=40036a4d5c7d85e0800678a09fcb68c">https://www.scopus.com/inward/record.uri?eid=2-s2.0-84882641036&amp;doi=10.3390%2Fsu5010228&amp;partnerID=40&amp;md5=40036a4d5c7d85e0800678a09fcb68c</a>                                 | Article      | Mekong delta, Vietnam      |
| 5-10 | Yang C., Li S.-M.                                           | Transformation of cross-boundary governance in the Greater Pearl River Delta, China: Contested geopolitics and emerging conflicts | 2013 | Habitat International                                               | 10.1016/j.habitatint.2013.02.001 | <a href="https://www.scopus.com/inward/record.uri?eid=2-s2.0-84874723220&amp;doi=10.1016%2Fj.habitatint.2013.02.001&amp;partnerID=40&amp;md5=2a9712a3ccd711a2bc028f9817de5e15">https://www.scopus.com/inward/record.uri?eid=2-s2.0-84874723220&amp;doi=10.1016%2Fj.habitatint.2013.02.001&amp;partnerID=40&amp;md5=2a9712a3ccd711a2bc028f9817de5e15</a> | Article      | Pearl river delta, China   |
| 5-11 | Schoon S.                                                   | Chinese strategies of experimental governance. The underlying forces influencing urban restructuring in the Pearl River Delta     | 2014 | Cities                                                              | 10.1016/j.cities.2014.01.008     | <a href="https://www.scopus.com/inward/record.uri?eid=2-s2.0-84952298734&amp;doi=10.1016%2Fj.cities.2014.01.008&amp;partnerID=40&amp;md5=40c83f1db925bafbf3f4a14d2f7edbbf">https://www.scopus.com/inward/record.uri?eid=2-s2.0-84952298734&amp;doi=10.1016%2Fj.cities.2014.01.008&amp;partnerID=40&amp;md5=40c83f1db925bafbf3f4a14d2f7edbbf</a>         | Article      | Pearl river delta, China   |
| 5-12 | Wang L., Shen J., Chung C.K.L.                              | City profile: Suzhou - a Chinese city under transformation                                                                        | 2015 | Cities                                                              | 10.1016/j.cities.2014.12.005     | <a href="https://www.scopus.com/inward/record.uri?eid=2-s2.0-84961291025&amp;doi=10.1016%2Fj.cities.2014.12.005&amp;partnerID=40&amp;md5=9fb62c4c381bbb121cd35687d5ff8684">https://www.scopus.com/inward/record.uri?eid=2-s2.0-84961291025&amp;doi=10.1016%2Fj.cities.2014.12.005&amp;partnerID=40&amp;md5=9fb62c4c381bbb121cd35687d5ff8684</a>         | Article      | Pearl river delta, China   |
| 5-13 | Garschagen M.                                               | Risky change? Vietnam's urban flood risk governance between climate dynamics and transformation                                   | 2015 | Pacific Affairs                                                     | 10.5509/201583599                | <a href="https://www.scopus.com/inward/record.uri?eid=2-s2.0-84940118138&amp;doi=10.5509%2F2015883599&amp;partnerID=40&amp;md5=09524d08e5636205ccd2a4209ce705c2">https://www.scopus.com/inward/record.uri?eid=2-s2.0-84940118138&amp;doi=10.5509%2F2015883599&amp;partnerID=40&amp;md5=09524d08e5636205ccd2a4209ce705c2</a>                             | Article      | Mekong delta, Vietnam      |
| 5-14 | Li Y., Wu F.                                                | Towards new regionalism? Case study of changing regional governance in the Yangtze River Delta                                    | 2012 | Asia Pacific Viewpoint                                              | 10.1111/j.1467-8373.2012.01479.x | <a href="https://www.scopus.com/inward/record.uri?eid=2-s2.0-84864773960&amp;doi=10.1111%2Fj.1467-8373.2012.01479.x&amp;partnerID=40&amp;md5=6b755a7edf351dc6cbf3d0a8c64f74a0">https://www.scopus.com/inward/record.uri?eid=2-s2.0-84864773960&amp;doi=10.1111%2Fj.1467-8373.2012.01479.x&amp;partnerID=40&amp;md5=6b755a7edf351dc6cbf3d0a8c64f74a0</a> | Article      | Yangtze river delta, China |
| 5-15 | Xu J., Yeh A.G.O.                                           | Political economy of regional cooperation in the pan-pearl river delta                                                            | 2011 | China's Pan-Pearl River Delta: Regional Cooperation and Development |                                  | <a href="https://www.scopus.com/inward/record.uri?eid=2-s2.0-84888073696&amp;partnerID=40&amp;md5=63d233e62a41a2508200824da1c7d2e0">https://www.scopus.com/inward/record.uri?eid=2-s2.0-84888073696&amp;partnerID=40&amp;md5=63d233e62a41a2508200824da1c7d2e0</a>                                                                                       | Book Chapter | Pearl river delta, China   |
| 5-16 | Ma X., Tao J.                                               | Cross-border environmental governance in the greater pearl river delta (GPRD)                                                     | 2010 | International Journal of Environmental Studies                      | 10.1080/00207231003693282        | <a href="https://www.scopus.com/inward/record.uri?eid=2-s2.0-77951715004&amp;doi=10.1080%2F00207231003693282&amp;partnerID=40&amp;md5=b44bdbdb4d233ef5eef4385ac6fff56">https://www.scopus.com/inward/record.uri?eid=2-s2.0-77951715004&amp;doi=10.1080%2F00207231003693282&amp;partnerID=40&amp;md5=b44bdbdb4d233ef5eef4385ac6fff56</a>                 | Article      | Pearl river delta, China   |

|      |                                  |                                                                                                                                                                                |      |                                                                       |                              |                                                                                                                                                                                                                                                                                                                                                 |              |                          |
|------|----------------------------------|--------------------------------------------------------------------------------------------------------------------------------------------------------------------------------|------|-----------------------------------------------------------------------|------------------------------|-------------------------------------------------------------------------------------------------------------------------------------------------------------------------------------------------------------------------------------------------------------------------------------------------------------------------------------------------|--------------|--------------------------|
| 5-17 | Xu J.                            | Contentious space and scale politics: Planning for intercity railway in China's mega-city regions                                                                              | 2017 | Asia Pacific Viewpoint                                                | 10.1111/apv.12142            | <a href="https://www.scopus.com/inward/record.uri?eid=2-s2.0-84995463484&amp;doi=10.1111%2fapv.12142&amp;partnerID=40&amp;md5=8aa6df519496750a2ed9bf345889e750">https://www.scopus.com/inward/record.uri?eid=2-s2.0-84995463484&amp;doi=10.1111%2fapv.12142&amp;partnerID=40&amp;md5=8aa6df519496750a2ed9bf345889e750</a>                       | Article      | Pearl river delta, China |
| 5-18 | den Hartog H.                    | Rural to urban transitions at Shanghai's fringes: Explaining spatial transformation in the backyard of a Chinese mega-city with the help of the Layers-Approach                | 2017 | International Review for Spatial Planning and Sustainable Development | 10.14246/irspsd.5.4_54       | <a href="https://www.scopus.com/inward/record.uri?eid=2-s2.0-85031918017&amp;doi=10.14246%2firspsd.5.4_54&amp;partnerID=40&amp;md5=fa0a2f87b9ee6b14215ab1f71daadc3">https://www.scopus.com/inward/record.uri?eid=2-s2.0-85031918017&amp;doi=10.14246%2firspsd.5.4_54&amp;partnerID=40&amp;md5=fa0a2f87b9ee6b14215ab1f71daadc3</a>               | Article      | Pearl river delta, China |
| 5-19 | Sandberg A.                      | Institutional challenges to robustness of delta and floodplain agricultural systems                                                                                            | 2010 | Environmental Hazards                                                 | 10.3763/ehaz.2010.0049       | <a href="https://www.scopus.com/inward/record.uri?eid=2-s2.0-85009106166&amp;doi=10.3763%2fehaz.2010.0049&amp;partnerID=40&amp;md5=9dda55109424532f4d5379cf4359f537">https://www.scopus.com/inward/record.uri?eid=2-s2.0-85009106166&amp;doi=10.3763%2fehaz.2010.0049&amp;partnerID=40&amp;md5=9dda55109424532f4d5379cf4359f537</a>             | Article      | Global                   |
| 5-20 | Zinzani A.                       | International development policies and coastalscape metabolism: The case of the Mekong Delta, Vietnam                                                                          | 2018 | Social Sciences                                                       | 10.3390/socsci7.020019       | <a href="https://www.scopus.com/inward/record.uri?eid=2-s2.0-85041349261&amp;doi=10.3390%2fsocsci702019&amp;partnerID=40&amp;md5=82a6cb5e3ebb7272f982acb400ac595d">https://www.scopus.com/inward/record.uri?eid=2-s2.0-85041349261&amp;doi=10.3390%2fsocsci702019&amp;partnerID=40&amp;md5=82a6cb5e3ebb7272f982acb400ac595d</a>                 | Article      | Mekong delta, Vietnam    |
| 5-21 | Altrock U., Schoon S.            | Maturing megacities: Lessons from the Pearl River Delta experiences                                                                                                            | 2014 | Advances in Asian Human-Environmental Research                        | 10.1007/978-94-007-6674-7_16 | <a href="https://www.scopus.com/inward/record.uri?eid=2-s2.0-84952301713&amp;doi=10.1007%2f978-94-007-6674-7_16&amp;partnerID=40&amp;md5=2dba8114ed62f35fddcfd9941c7fc770">https://www.scopus.com/inward/record.uri?eid=2-s2.0-84952301713&amp;doi=10.1007%2f978-94-007-6674-7_16&amp;partnerID=40&amp;md5=2dba8114ed62f35fddcfd9941c7fc770</a> | Book Chapter | Pearl river delta, China |
| 5-22 | Altrock U., Schoon S.            | The Pearl River Delta in progressive transformation                                                                                                                            | 2014 | Advances in Asian Human-Environmental Research                        | 10.1007/978-94-007-6674-7_1  | <a href="https://www.scopus.com/inward/record.uri?eid=2-s2.0-85031504289&amp;doi=10.1007%2f978-94-007-6674-7_1&amp;partnerID=40&amp;md5=53fb3d7380b409b7e648e9e3371a8246">https://www.scopus.com/inward/record.uri?eid=2-s2.0-85031504289&amp;doi=10.1007%2f978-94-007-6674-7_1&amp;partnerID=40&amp;md5=53fb3d7380b409b7e648e9e3371a8246</a>   | Book Chapter | Pearl river delta, China |
| 5-23 | Diez J.R., Schiller D., Meyer S. | Capitalising on institutional diversity and complementary resources in cross-border metropolitan regions: The case of electronics firms in Hong Kong and the pearl river delta | 2013 | Advances in Spatial Science                                           | 10.1007/978-3-642-32141-2_17 | <a href="https://www.scopus.com/inward/record.uri?eid=2-s2.0-85020132774&amp;doi=10.1007%2f978-3-642-32141-2_17&amp;partnerID=40&amp;md5=abc4f1c208ac93adf65fb1f01b194d0c">https://www.scopus.com/inward/record.uri?eid=2-s2.0-85020132774&amp;doi=10.1007%2f978-3-642-32141-2_17&amp;partnerID=40&amp;md5=abc4f1c208ac93adf65fb1f01b194d0c</a> | Book Chapter | Pearl river delta, China |

|                     |                                              |                                                                              |             |                                                   |                            |                                                                                                                                                                                                                                                                                                                                             |                      |                              |
|---------------------|----------------------------------------------|------------------------------------------------------------------------------|-------------|---------------------------------------------------|----------------------------|---------------------------------------------------------------------------------------------------------------------------------------------------------------------------------------------------------------------------------------------------------------------------------------------------------------------------------------------|----------------------|------------------------------|
| <b>6</b>            | <b>Transition pre/O Management AND Delta</b> |                                                                              | <b>N=1</b>  |                                                   |                            |                                                                                                                                                                                                                                                                                                                                             |                      |                              |
| <b>Article code</b> | <b>Authors</b>                               | <b>Title</b>                                                                 | <b>Year</b> | <b>Source title</b>                               | <b>DOI</b>                 | <b>Link</b>                                                                                                                                                                                                                                                                                                                                 | <b>Document Type</b> | <b>Main location covered</b> |
| 6-01                | Jhagroe S., Loorbach D.                      | See no evil, hear no evil: The democratic potential of transition management | 2015        | Environmental Innovation and Societal Transitions | 10.1016/j.eist.2014.07.001 | <a href="https://www.scopus.com/inward/record.uri?eid=2-s2.0-84930047259&amp;doi=10.1016%2fj.eist.2014.07.001&amp;partnerID=40&amp;md5=3460acb7a1383b9ece20b5b66b4c7bc0">https://www.scopus.com/inward/record.uri?eid=2-s2.0-84930047259&amp;doi=10.1016%2fj.eist.2014.07.001&amp;partnerID=40&amp;md5=3460acb7a1383b9ece20b5b66b4c7bc0</a> | Article              | Dutch delta, The Netherlands |

| 7            | Delta AND Adaptation pre/0 Pathway                                                                                                      |                                                                                                                                                                            | N=18 |                                                                                                    |                                 |                                                                                                                                                                                                                                                                                                                                                       |               |                                                                                         |
|--------------|-----------------------------------------------------------------------------------------------------------------------------------------|----------------------------------------------------------------------------------------------------------------------------------------------------------------------------|------|----------------------------------------------------------------------------------------------------|---------------------------------|-------------------------------------------------------------------------------------------------------------------------------------------------------------------------------------------------------------------------------------------------------------------------------------------------------------------------------------------------------|---------------|-----------------------------------------------------------------------------------------|
| Article code | Authors                                                                                                                                 | Title                                                                                                                                                                      | Year | Source title                                                                                       | DOI                             | Link                                                                                                                                                                                                                                                                                                                                                  | Document Type | Main location covered                                                                   |
| 7-01         | Haasnoot M., Kwakkel J.H., Walker W.E., ter Maat J.                                                                                     | Dynamic adaptive policy pathways: A method for crafting robust decisions for a deeply uncertain world                                                                      | 2013 | Global Environmental Change                                                                        | 10.1016/j.gloenvcha.2012.12.006 | <a href="https://www.scopus.com/inward/record.uri?eid=2-s2.0-84878015971&amp;doi=10.1016%2fj.gloenvcha.2012.12.006&amp;partnerID=40&amp;md5=f13e8ef4d13ed0ac1f7ab5d076416657">https://www.scopus.com/inward/record.uri?eid=2-s2.0-84878015971&amp;doi=10.1016%2fj.gloenvcha.2012.12.006&amp;partnerID=40&amp;md5=f13e8ef4d13ed0ac1f7ab5d076416657</a> | Article       | Dutch delta, The Netherlands                                                            |
| 7-02         | Haasnoot M., Middelkoop H., Offermans A., van Beek E., van Deursen W.P.A.                                                               | Exploring pathways for sustainable water management in river deltas in a changing environment                                                                              | 2012 | Climatic Change                                                                                    | 10.1007/s10584-012-0444-2       | <a href="https://www.scopus.com/inward/record.uri?eid=2-s2.0-84868681090&amp;doi=10.1007%2f10584-012-0444-2&amp;partnerID=40&amp;md5=7b00e65a5ff212ad0f7e7aa1a6fc4573">https://www.scopus.com/inward/record.uri?eid=2-s2.0-84868681090&amp;doi=10.1007%2f10584-012-0444-2&amp;partnerID=40&amp;md5=7b00e65a5ff212ad0f7e7aa1a6fc4573</a>               | Article       | Dutch delta, The Netherlands                                                            |
| 7-03         | Haasnoot M., van Deursen W.P.A., Guillaume J.H.A., Kwakkel J.H., van Beek E., Middelkoop H.                                             | Fit for purpose? Building and evaluating a fast, integrated model for exploring water policy pathways                                                                      | 2014 | Environmental Modelling and Software                                                               | 10.1016/j.envsoft.2014.05.020   | <a href="https://www.scopus.com/inward/record.uri?eid=2-s2.0-84903590234&amp;doi=10.1016%2fj.envsoft.2014.05.020&amp;partnerID=40&amp;md5=6a941bd8e911974bbf4cbe4a8a7f0898">https://www.scopus.com/inward/record.uri?eid=2-s2.0-84903590234&amp;doi=10.1016%2fj.envsoft.2014.05.020&amp;partnerID=40&amp;md5=6a941bd8e911974bbf4cbe4a8a7f0898</a>     | Article       | Dutch delta, The Netherlands                                                            |
| 7-04         | Kwakkel J.H., Haasnoot M., Walker W.E.                                                                                                  | Comparing Robust Decision-Making and Dynamic Adaptive Policy Pathways for model-based decision support under deep uncertainty                                              | 2016 | Environmental Modelling and Software                                                               | 10.1016/j.envsoft.2016.09.017   | <a href="https://www.scopus.com/inward/record.uri?eid=2-s2.0-84991486853&amp;doi=10.1016%2fj.envsoft.2016.09.017&amp;partnerID=40&amp;md5=77b0970b520d44771d5ffddfbf6ac919">https://www.scopus.com/inward/record.uri?eid=2-s2.0-84991486853&amp;doi=10.1016%2fj.envsoft.2016.09.017&amp;partnerID=40&amp;md5=77b0970b520d44771d5ffddfbf6ac919</a>     | Article       | Dutch delta, The Netherlands                                                            |
| 7-05         | Ibáñez C., Day J.W., Reyes E.                                                                                                           | The response of deltas to sea-level rise: Natural mechanisms and management options to adapt to high-end scenarios                                                         | 2014 | Ecological Engineering                                                                             | 10.1016/j.ecoleng.2013.08.002   | <a href="https://www.scopus.com/inward/record.uri?eid=2-s2.0-84900525276&amp;doi=10.1016%2fj.ecoleng.2013.08.002&amp;partnerID=40&amp;md5=a9231325462531bdd20cae7b8ff43c22">https://www.scopus.com/inward/record.uri?eid=2-s2.0-84900525276&amp;doi=10.1016%2fj.ecoleng.2013.08.002&amp;partnerID=40&amp;md5=a9231325462531bdd20cae7b8ff43c22</a>     | Article       | Global                                                                                  |
| 7-06         | Hermans L.M., Haasnoot M., ter Maat J., Kwakkel J.H.                                                                                    | Designing monitoring arrangements for collaborative learning about adaptation pathways                                                                                     | 2017 | Environmental Science and Policy                                                                   | 10.1016/j.envsci.2016.12.005    | <a href="https://www.scopus.com/inward/record.uri?eid=2-s2.0-85007044399&amp;doi=10.1016%2fj.envsci.2016.12.005&amp;partnerID=40&amp;md5=44a530ccf2d123bc36954ed20a7b44cc">https://www.scopus.com/inward/record.uri?eid=2-s2.0-85007044399&amp;doi=10.1016%2fj.envsci.2016.12.005&amp;partnerID=40&amp;md5=44a530ccf2d123bc36954ed20a7b44cc</a>       | Article       | Mekong delta, Vietnam                                                                   |
| 7-07         | Nicholls R.J., Brown S., Goodwin P., Wahl T., Lowe J., Solan M., Godbold J.A., Haigh I.D., Lincke D., Hinkel J., Wolf C., Merkens J.-L. | Stabilization of global temperature at 1.5°C and 2.0°C: Implications for coastal areas                                                                                     | 2018 | Philosophical Transactions of the Royal Society A: Mathematical, Physical and Engineering Sciences | 10.1098/rsta.2016.0448          | <a href="https://www.scopus.com/inward/record.uri?eid=2-s2.0-8504553830&amp;doi=10.1098%2frsta.2016.0448&amp;partnerID=40&amp;md5=29d05c8a5cd416cf290d4348c8ff700f7">https://www.scopus.com/inward/record.uri?eid=2-s2.0-8504553830&amp;doi=10.1098%2frsta.2016.0448&amp;partnerID=40&amp;md5=29d05c8a5cd416cf290d4348c8ff700f7</a>                   | Article       | Global                                                                                  |
| 7-08         | Haasnoot M., Schellekens J., Beersma J.J., Middelkoop H., Kwadijk J.C.J.                                                                | Transient scenarios for robust climate change adaptation illustrated for water management in the Netherlands                                                               | 2015 | Environmental Research Letters                                                                     | 10.1088/1748-9326/10/10/105008  | <a href="https://www.scopus.com/inward/record.uri?eid=2-s2.0-84956681718&amp;doi=10.1088%2f1748-9326%2f10%2f105008&amp;partnerID=40&amp;md5=1e32aebbedd722ced48da1ee511c35d0">https://www.scopus.com/inward/record.uri?eid=2-s2.0-84956681718&amp;doi=10.1088%2f1748-9326%2f10%2f105008&amp;partnerID=40&amp;md5=1e32aebbedd722ced48da1ee511c35d0</a> | Article       | Dutch delta, The Netherlands                                                            |
| 7-09         | Jeuken A., Haasnoot M., Reeder T., Ward P.                                                                                              | Lessons learnt from adaptation planning in four deltas and coastal cities                                                                                                  | 2015 | Journal of Water and Climate Change                                                                | 10.2166/wcc.2014.141            | <a href="https://www.scopus.com/inward/record.uri?eid=2-s2.0-84957696134&amp;doi=10.2166%2fwcc.2014.141&amp;partnerID=40&amp;md5=cb7d843d07032066e0f179b9e2d1e8fe">https://www.scopus.com/inward/record.uri?eid=2-s2.0-84957696134&amp;doi=10.2166%2fwcc.2014.141&amp;partnerID=40&amp;md5=cb7d843d07032066e0f179b9e2d1e8fe</a>                       | Article       | Dutch delta, The Netherlands, Thames river, UK, New York City, USA, Jakarta, Indonesia, |
| 7-10         | Dewulf A., Termeer C.                                                                                                                   | Governing the future? The potential of adaptive delta management to contribute to governance capabilities for dealing with the wicked problem of climate change adaptation | 2015 | Journal of Water and Climate Change                                                                | 10.2166/wcc.2015.117            | <a href="https://www.scopus.com/inward/record.uri?eid=2-s2.0-84957709661&amp;doi=10.2166%2fwcc.2015.117&amp;partnerID=40&amp;md5=6493b7737b3ea9f09756866bcf2ba0c2">https://www.scopus.com/inward/record.uri?eid=2-s2.0-84957709661&amp;doi=10.2166%2fwcc.2015.117&amp;partnerID=40&amp;md5=6493b7737b3ea9f09756866bcf2ba0c2</a>                       | Article       | Dutch delta, The Netherlands                                                            |

|      |                                                                                                   |                                                                                                                                                                      |      |                                                                                                                                                                |                                 |                                                                                                                                                                                                                                                                                                                                                       |                  |                              |
|------|---------------------------------------------------------------------------------------------------|----------------------------------------------------------------------------------------------------------------------------------------------------------------------|------|----------------------------------------------------------------------------------------------------------------------------------------------------------------|---------------------------------|-------------------------------------------------------------------------------------------------------------------------------------------------------------------------------------------------------------------------------------------------------------------------------------------------------------------------------------------------------|------------------|------------------------------|
| 7-11 | Haasnoot M., van 't Klooster S., van Alphen J.                                                    | Designing a monitoring system to detect signals to adapt to uncertain climate change                                                                                 | 2018 | Global Environmental Change                                                                                                                                    | 10.1016/j.gloenvcha.2018.08.003 | <a href="https://www.scopus.com/inward/record.uri?eid=2-s2.0-85052886089&amp;doi=10.1016%2fj.gloenvcha.2018.08.003&amp;partnerID=40&amp;md5=8f6a9ea9a68d6c17704f136efbe2ac43">https://www.scopus.com/inward/record.uri?eid=2-s2.0-85052886089&amp;doi=10.1016%2fj.gloenvcha.2018.08.003&amp;partnerID=40&amp;md5=8f6a9ea9a68d6c17704f136efbe2ac43</a> | Article          | Dutch delta, The Netherlands |
| 7-12 | Kwakkel J., Haasnoot M.                                                                           | Computer assisted dynamic adaptive policy design for Sustainable water management in river deltas in a changing environment                                          | 2012 | iEMSs 2012 - Managing Resources of a Limited Planet: Proceedings of the 6th Biennial Meeting of the International Environmental Modelling and Software Society |                                 | <a href="https://www.scopus.com/inward/record.uri?eid=2-s2.0-84894168128&amp;partnerID=40&amp;md5=a662ec78f59ec13a8a08f7c80231f9a5">https://www.scopus.com/inward/record.uri?eid=2-s2.0-84894168128&amp;partnerID=40&amp;md5=a662ec78f59ec13a8a08f7c80231f9a5</a>                                                                                     | Conference Paper | Dutch delta, The Netherlands |
| 7-13 | Scussolini P., Tran T.T.V., Koks E., Diaz-Loaiza A., Ho P.L., Lasage R.                           | Adaptation to Sea Level Rise: A Multidisciplinary Analysis for Ho Chi Minh City, Vietnam                                                                             | 2017 | Water Resources Research                                                                                                                                       | 10.1002/2017WR021344            | <a href="https://www.scopus.com/inward/record.uri?eid=2-s2.0-85039701579&amp;doi=10.1002%2f2017WR021344&amp;partnerID=40&amp;md5=ef463422e936cc214d90b504c2d37250">https://www.scopus.com/inward/record.uri?eid=2-s2.0-85039701579&amp;doi=10.1002%2f2017WR021344&amp;partnerID=40&amp;md5=ef463422e936cc214d90b504c2d37250</a>                       | Article          | Mekong delta, Vietnam        |
| 7-14 | Radhakrishnan M., Nguyen H.Q., Gersonius B., Pathirana A., Vinh K.Q., Ashley R.M., Zevenbergen C. | Coping capacities for improving adaptation pathways for flood protection in Can Tho, Vietnam                                                                         | 2018 | Climatic Change                                                                                                                                                | 10.1007/s10584-017-1999-8       | <a href="https://www.scopus.com/inward/record.uri?eid=2-s2.0-85013761118&amp;doi=10.1007%2f10584-017-1999-8&amp;partnerID=40&amp;md5=498a4207535f748486f0411ddfc7a0b6">https://www.scopus.com/inward/record.uri?eid=2-s2.0-85013761118&amp;doi=10.1007%2f10584-017-1999-8&amp;partnerID=40&amp;md5=498a4207535f748486f0411ddfc7a0b6</a>               | Article          | Mekong delta, Vietnam        |
| 7-15 | Haasnoot M., Van Deursen W.P.A., Middelkoop H., Van Beek E., Wijermans N.                         | An Integrated Assessment MetaModel for developing adaptation pathways for sustainable water management in the lower Rhine Delta                                      | 2012 | iEMSs 2012 - Managing Resources of a Limited Planet: Proceedings of the 6th Biennial Meeting of the International Environmental Modelling and Software Society |                                 | <a href="https://www.scopus.com/inward/record.uri?eid=2-s2.0-84894115912&amp;partnerID=40&amp;md5=773de08b7df6380a8263ce602f8264d8">https://www.scopus.com/inward/record.uri?eid=2-s2.0-84894115912&amp;partnerID=40&amp;md5=773de08b7df6380a8263ce602f8264d8</a>                                                                                     | Conference Paper | Dutch delta, The Netherlands |
| 7-16 | Nguyen M.T., Renaud F.G., Sebesvari Z.                                                            | Drivers of change and adaptation pathways of agricultural systems facing increased salinity intrusion in coastal areas of the Mekong and Red River deltas in Vietnam | 2019 | Environmental Science and Policy                                                                                                                               | 10.1016/j.envsci.2018.10.016    | <a href="https://www.scopus.com/inward/record.uri?eid=2-s2.0-85057045993&amp;doi=10.1016%2fj.envsci.2018.10.016&amp;partnerID=40&amp;md5=129022f43fde58fca3036bdacd7b2f66">https://www.scopus.com/inward/record.uri?eid=2-s2.0-85057045993&amp;doi=10.1016%2fj.envsci.2018.10.016&amp;partnerID=40&amp;md5=129022f43fde58fca3036bdacd7b2f66</a>       | Article          | Mekong delta, Vietnam        |
| 7-17 | Haasnoot M., Van Deursen W.P.A., Middelkoop H., Van Beek E., Wijermans N.                         | An Integrated Assessment MetaModel for developing adaptation pathways for sustainable water management in the lower Rhine Delta                                      | 2012 | iEMSs 2012 - Managing Resources of a Limited Planet: Proceedings of the 6th Biennial Meeting of the International Environmental Modelling and Software Society |                                 | <a href="https://www.scopus.com/inward/record.uri?eid=2-s2.0-84894115912&amp;partnerID=40&amp;md5=773de08b7df6380a8263ce602f8264d8">https://www.scopus.com/inward/record.uri?eid=2-s2.0-84894115912&amp;partnerID=40&amp;md5=773de08b7df6380a8263ce602f8264d8</a>                                                                                     | Conference Paper | Dutch delta, The Netherlands |

|                     |                                                                                                                              |                                                                                                             |             |                              |                        |                                                                                                                                                                                                                                                                                                                                     |                      |                                             |
|---------------------|------------------------------------------------------------------------------------------------------------------------------|-------------------------------------------------------------------------------------------------------------|-------------|------------------------------|------------------------|-------------------------------------------------------------------------------------------------------------------------------------------------------------------------------------------------------------------------------------------------------------------------------------------------------------------------------------|----------------------|---------------------------------------------|
| <b>8</b>            | <b>Delta AND Governance AND Brahmaputra</b>                                                                                  |                                                                                                             | <b>N=4</b>  |                              |                        |                                                                                                                                                                                                                                                                                                                                     |                      |                                             |
| <b>Article code</b> | <b>Authors</b>                                                                                                               | <b>Title</b>                                                                                                | <b>Year</b> | <b>Source title</b>          | <b>DOI</b>             | <b>Link</b>                                                                                                                                                                                                                                                                                                                         | <b>Document Type</b> | <b>Main location covered</b>                |
| 8-1                 | Gain A.K., Ashik-Ur-Rahman Md., Benson D.                                                                                    | Exploring institutional structures for Tidal River Management in the Ganges-Brahmaputra Delta in Bangladesh | 2019        | Erde                         | 10.12854/erde-2019-434 | <a href="https://www.scopus.com/inward/record.uri?eid=2-s2.0-85073149045&amp;doi=10.12854%2ferde-2019-434&amp;partnerID=40&amp;md5=eb8386fbae3f4885c78a77f9b14659a0">https://www.scopus.com/inward/record.uri?eid=2-s2.0-85073149045&amp;doi=10.12854%2ferde-2019-434&amp;partnerID=40&amp;md5=eb8386fbae3f4885c78a77f9b14659a0</a> | Article              | Ganges-Brahmaputra delta, India, Bangladesh |
| 8-2                 | Hossen M.A., Chowdhury M.A., Hans A., Tagoe C.A., Allan A., Nelson W., Patel A., Mondal M.S., Salehin M., Quaye R.M., Das S. | Governance challenges in addressing climatic concerns in coastal asia and Africa                            | 2019        | Sustainability (Switzerland) | 10.3390/su10022148     | <a href="https://www.scopus.com/inward/record.uri?eid=2-s2.0-85069790098&amp;doi=10.3390%2fsu10022148&amp;partnerID=40&amp;md5=79e8f3505eb2fe6b52fb0b0ec22fdb7">https://www.scopus.com/inward/record.uri?eid=2-s2.0-85069790098&amp;doi=10.3390%2fsu10022148&amp;partnerID=40&amp;md5=79e8f3505eb2fe6b52fb0b0ec22fdb7</a>           | Article              | Regional Asia Pacific                       |

|     |                                                                                                        |                                                                                                                              |      |                                           |                            |                                                                                                                                                                                                                                                                                                                                             |         |                                                    |
|-----|--------------------------------------------------------------------------------------------------------|------------------------------------------------------------------------------------------------------------------------------|------|-------------------------------------------|----------------------------|---------------------------------------------------------------------------------------------------------------------------------------------------------------------------------------------------------------------------------------------------------------------------------------------------------------------------------------------|---------|----------------------------------------------------|
| 8-3 | Nicholls R.J., Hutton C.W., Lázár A.N., Allan A., Adger W.N., Adams H., Wolf J., Rahman M., Salehin M. | Integrated assessment of social and environmental sustainability dynamics in the Ganges-Brahmaputra-Meghna delta, Bangladesh | 2016 | Estuarine, Coastal and Shelf Science      | 10.1016/j.ecss.2016.08.017 | <a href="https://www.scopus.com/inward/record.uri?eid=2-s2.0-84995395676&amp;doi=10.1016%2fj.ecss.2016.08.017&amp;partnerID=40&amp;md5=3f6dc3fb9e34f6a6304b96524cb110f1">https://www.scopus.com/inward/record.uri?eid=2-s2.0-84995395676&amp;doi=10.1016%2fj.ecss.2016.08.017&amp;partnerID=40&amp;md5=3f6dc3fb9e34f6a6304b96524cb110f1</a> | Article | Ganges-Brahmaputra-Meghna delta, India, Bangladesh |
| 8-4 | Mayer B.                                                                                               | Environmental migration: Prospects for a regional governance in the Asia-Pacific region                                      | 2013 | Asia Pacific Journal of Environmental Law |                            | <a href="https://www.scopus.com/inward/record.uri?eid=2-s2.0-84892973548&amp;partnerID=40&amp;md5=4eb3f1a5a308bbcc017f524ffe49285c">https://www.scopus.com/inward/record.uri?eid=2-s2.0-84892973548&amp;partnerID=40&amp;md5=4eb3f1a5a308bbcc017f524ffe49285c</a>                                                                           | Review  | Regional Asia Pacific                              |

| 9            | Delta AND Governance AND Nile |                                                                              | N=4  |                                                                                       |                               |                                                                                                                                                                                                                                                                                                                                                   |               |                       |
|--------------|-------------------------------|------------------------------------------------------------------------------|------|---------------------------------------------------------------------------------------|-------------------------------|---------------------------------------------------------------------------------------------------------------------------------------------------------------------------------------------------------------------------------------------------------------------------------------------------------------------------------------------------|---------------|-----------------------|
| Article code | Authors                       | Title                                                                        | Year | Source title                                                                          | DOI                           | Link                                                                                                                                                                                                                                                                                                                                              | Document Type | Main location covered |
| 9-1          | ElDidi H., Corbera E.         | A Moral Economy of Water: Charity Wells in Egypt's Nile Delta                | 2017 | Development and Change                                                                | 10.1111/dech.12286            | <a href="https://www.scopus.com/inward/record.uri?eid=2-s2.0-85010332665&amp;doi=10.1111%2fdech.12286&amp;partnerID=40&amp;md5=b3930144027dc00dfe5a0985dedc11a3">https://www.scopus.com/inward/record.uri?eid=2-s2.0-85010332665&amp;doi=10.1111%2fdech.12286&amp;partnerID=40&amp;md5=b3930144027dc00dfe5a0985dedc11a3</a>                       | Article       | Nile delta, Egypt     |
| 9-2          | Badran A.                     | Climate change and water science policy in management                        | 2017 | Water, Energy and Food Sustainability in the Middle East: The Sustainability Triangle | 10.1007/978-3-319-48920-9_1   | <a href="https://www.scopus.com/inward/record.uri?eid=2-s2.0-85034240714&amp;doi=10.1007%2f978-3-319-48920-9_1&amp;partnerID=40&amp;md5=a58c9eb9442db34a3d69cd23562582f0">https://www.scopus.com/inward/record.uri?eid=2-s2.0-85034240714&amp;doi=10.1007%2f978-3-319-48920-9_1&amp;partnerID=40&amp;md5=a58c9eb9442db34a3d69cd23562582f0</a>     | Book Chapter  | Nile delta, Egypt     |
| 9-3          | Abdel-Dayem S.                | Water quality management in Egypt                                            | 2011 | International Journal of Water Resources Development                                  | 10.1080/07900627.2010.531522  | <a href="https://www.scopus.com/inward/record.uri?eid=2-s2.0-79551703928&amp;doi=10.1080%2f07900627.2010.531522&amp;partnerID=40&amp;md5=0ec3129655e27d19ba3edb30d19d49d5">https://www.scopus.com/inward/record.uri?eid=2-s2.0-79551703928&amp;doi=10.1080%2f07900627.2010.531522&amp;partnerID=40&amp;md5=0ec3129655e27d19ba3edb30d19d49d5</a>   | Article       | Nile delta, Egypt     |
| 9-4          | van Steenberg F., Dayem S.A.  | Making the case for integrated water resources management: Drainage in Egypt | 2007 | Water International                                                                   | 10.1080/02508060.2007.9671990 | <a href="https://www.scopus.com/inward/record.uri?eid=2-s2.0-80054788103&amp;doi=10.1080%2f02508060.2007.9671990&amp;partnerID=40&amp;md5=4a453f955de7a11e797062ad6caa287d">https://www.scopus.com/inward/record.uri?eid=2-s2.0-80054788103&amp;doi=10.1080%2f02508060.2007.9671990&amp;partnerID=40&amp;md5=4a453f955de7a11e797062ad6caa287d</a> | Review        | Nile delta, Egypt     |

| 10           | Delta AND Governance AND Mississippi |                                                                                                                      | N=3  |                                                                   |                              |                                                                                                                                                                                                                                                                                                                                                 |               |                        |
|--------------|--------------------------------------|----------------------------------------------------------------------------------------------------------------------|------|-------------------------------------------------------------------|------------------------------|-------------------------------------------------------------------------------------------------------------------------------------------------------------------------------------------------------------------------------------------------------------------------------------------------------------------------------------------------|---------------|------------------------|
| Article code | Authors                              | Title                                                                                                                | Year | Source title                                                      | DOI                          | Link                                                                                                                                                                                                                                                                                                                                            | Document Type | Main location covered  |
| 10-1         | Glavovic B.C.                        | Towards deliberative coastal governance: insights from South Africa and the Mississippi Delta                        | 2016 | Regional Environmental Change                                     | 10.1007/s10113-014-0727-4    | <a href="https://www.scopus.com/inward/record.uri?eid=2-s2.0-84956679900&amp;doi=10.1007%2fs10113-014-0727-4&amp;partnerID=40&amp;md5=4f5eba031f8ef6ca7516509403c442bd">https://www.scopus.com/inward/record.uri?eid=2-s2.0-84956679900&amp;doi=10.1007%2fs10113-014-0727-4&amp;partnerID=40&amp;md5=4f5eba031f8ef6ca7516509403c442bd</a>       | Article       | Mississippi delta, USA |
| 10-2         | Glavovic B.C.                        | Waves of adversity, layers of resilience: Floods, hurricanes, oil spills and climate change in the Mississippi delta | 2014 | Adapting to Climate Change: Lessons from Natural Hazards Planning | 10.1007/978-94-017-8631-7_15 | <a href="https://www.scopus.com/inward/record.uri?eid=2-s2.0-85015394336&amp;doi=10.1007%2f978-94-017-8631-7_15&amp;partnerID=40&amp;md5=0541e658db15e5023376e978c486911a">https://www.scopus.com/inward/record.uri?eid=2-s2.0-85015394336&amp;doi=10.1007%2f978-94-017-8631-7_15&amp;partnerID=40&amp;md5=0541e658db15e5023376e978c486911a</a> | Book Chapter  | Mississippi delta, USA |



|      |             |                                                                                                                                                            |      |                       |                              |                                                                                                                                                                                                                                                                                                                                                 |         |                        |
|------|-------------|------------------------------------------------------------------------------------------------------------------------------------------------------------|------|-----------------------|------------------------------|-------------------------------------------------------------------------------------------------------------------------------------------------------------------------------------------------------------------------------------------------------------------------------------------------------------------------------------------------|---------|------------------------|
| 10-3 | Harvey M.H. | Consensus-based community development, concentrated rural poverty, and local institutional structures: The obstacle of race in the lower Mississippi Delta | 2013 | Community Development | 10.1080/15575330.2012.734840 | <a href="https://www.scopus.com/inward/record.uri?eid=2-s2.0-84881022115&amp;doi=10.1080%2f15575330.2012.734840&amp;partnerID=40&amp;md5=ab474174f86bf4ba279c2d058b93a374">https://www.scopus.com/inward/record.uri?eid=2-s2.0-84881022115&amp;doi=10.1080%2f15575330.2012.734840&amp;partnerID=40&amp;md5=ab474174f86bf4ba279c2d058b93a374</a> | Article | Mississippi delta, USA |
|------|-------------|------------------------------------------------------------------------------------------------------------------------------------------------------------|------|-----------------------|------------------------------|-------------------------------------------------------------------------------------------------------------------------------------------------------------------------------------------------------------------------------------------------------------------------------------------------------------------------------------------------|---------|------------------------|
